# Supplementary material
Source: bioRxiv or medRxiv preprint supplement (https://medrxiv.org/highwire/filestream/86650/field_highwire_adjunct_files/0/2020.06.18.20134874-1.zip)

## South Korea

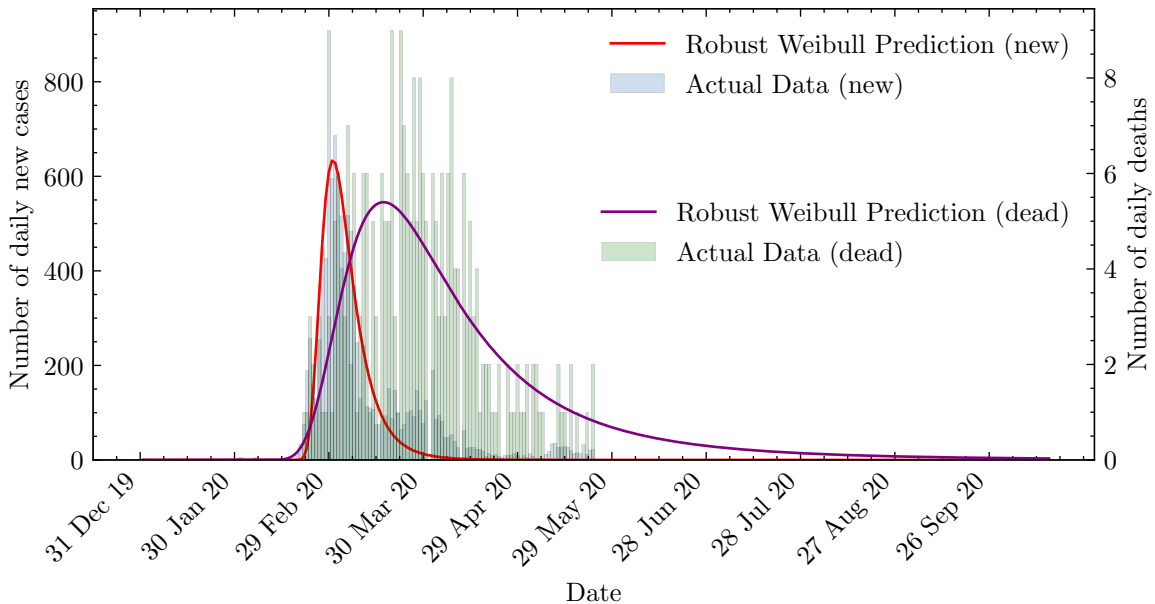

Supplement: Supplementary file [file 2020.06.18.20134874-1.zip]
